# Supplementary material for: Unexpected positive control of NFκB and miR-155 by DGKα and ζ ensures effector and memory CD8+ T cell differentiation
Source: PubMed Central journal article supplement (PMC5085116; doi:10.18632/oncotarget.8164), 2016-03-17
Supplement: oncotarget-07-33744-s001.pdf [file oncotarget-07-33744-s001.pdf]

# Unexpected positive control of NFκB and miR-155 by DGKα and ζ ensures effector and memory CD8<sup>+</sup> T Cell differentiation

## Supplementary Material

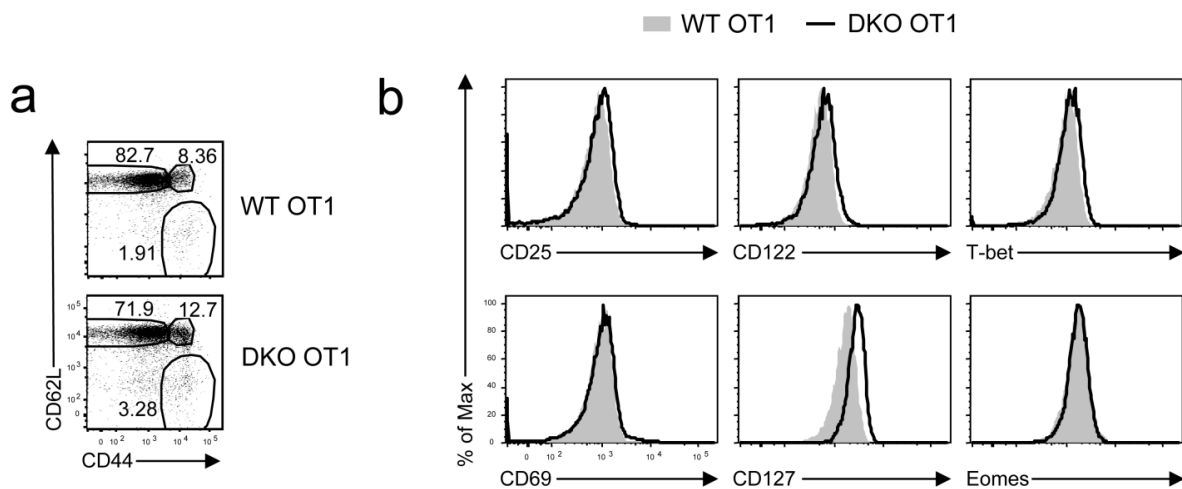

**Figure S1. WT OT1 and DGKα<sup>-/-</sup>ζ<sup>fl/fl</sup>-ERCre OT1 donor mice were treated with tamoxifen.**

(a) CD44/CD62L staining of gated CD8<sup>+</sup>TCRVα2<sup>+</sup> cells from splenocytes of WT and DKO OT1 mice after tamoxifen treatment. (b) Expression of indicated molecules in gated naïve CD44<sup>-</sup>CD62L<sup>+</sup>CD8<sup>+</sup>TCRVα2<sup>+</sup> OT1 cells. Data shown are representative of three independent experiments.

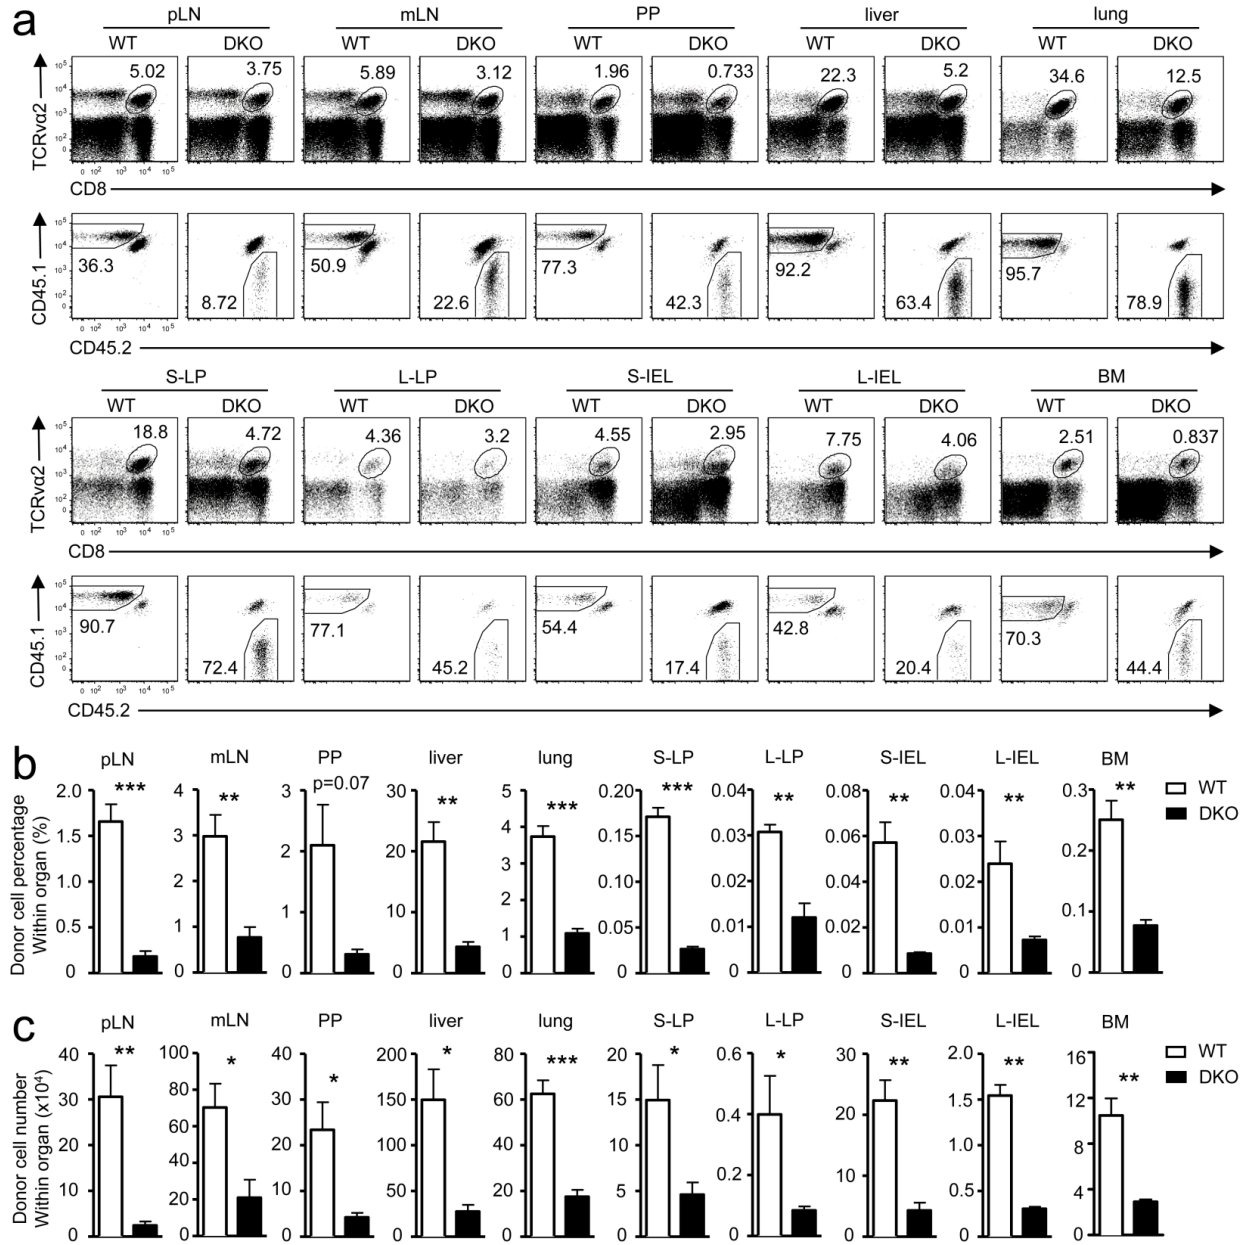

**Figure S2. Deficiency of DGK $\alpha$  and  $\zeta$  caused a global defect of CD8 effector cell expansion**

**in lymphoid and non-lymphoid organs.** (a-c) CD45.1<sup>+</sup>CD45.2<sup>+</sup> WT recipient mice injected with CD45.1<sup>+</sup> WT or CD45.2<sup>+</sup> DKO OT 1 T cells were infected with *LM-OVA* and indicated organs were harvested and analyzed on day 7 after infection. pLN, peripheral lympho node; mLN, mesenteric lymph node; PP, peyer's patch; S-LP, small intestinal lamina propria; L-LP,

large intestinal lamina propria; S-IEL, small intestinal epithelial lymphocyte; L-IEL, large intestinal epithelial lymphocyte; BM, bone marrow. (a) Representative dot plots of indicated organs. Top panels: CD8 and TCRV $\alpha$ 2 staining in gated live lymphoid cells. Bottom panels: Donor-derived CD45.1<sup>+</sup>CD45.2<sup>-</sup> WT or CD45.1<sup>-</sup>CD45.2<sup>+</sup> DKO OT1 from the gated TCRV $\alpha$ 2<sup>+</sup>CD8<sup>+</sup> population. (b-c) Percentages (b) and absolute number (c) of OT1 T cells in indicated organs. Bars represent mean  $\pm$  SEM (n=4). \*,  $P < 0.05$ ; \*\*,  $P < 0.01$ ; \*\*\*,  $P < 0.001$  (Student's  $t$  test). Data shown are representative two independent experiments.

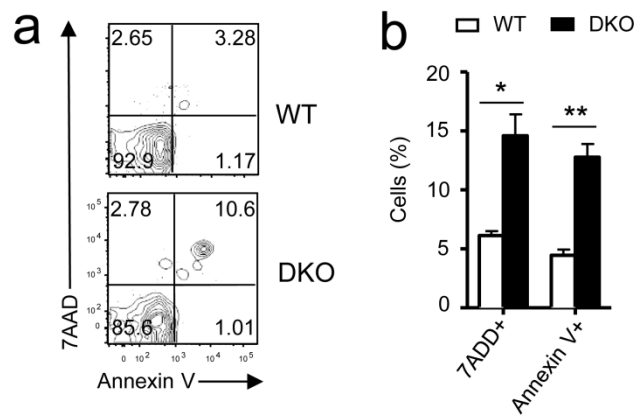

**Figure S3. Increased death of DKO OT 1 memory T cells.** (a–b) Frequencies of 7-AAD<sup>+</sup> and Annexin V<sup>+</sup> donor-derived OT1 T cells in PBLs on day 35 after *LM-OVA* infection. Data were calculated from the same experiment as in Fig. 3a.

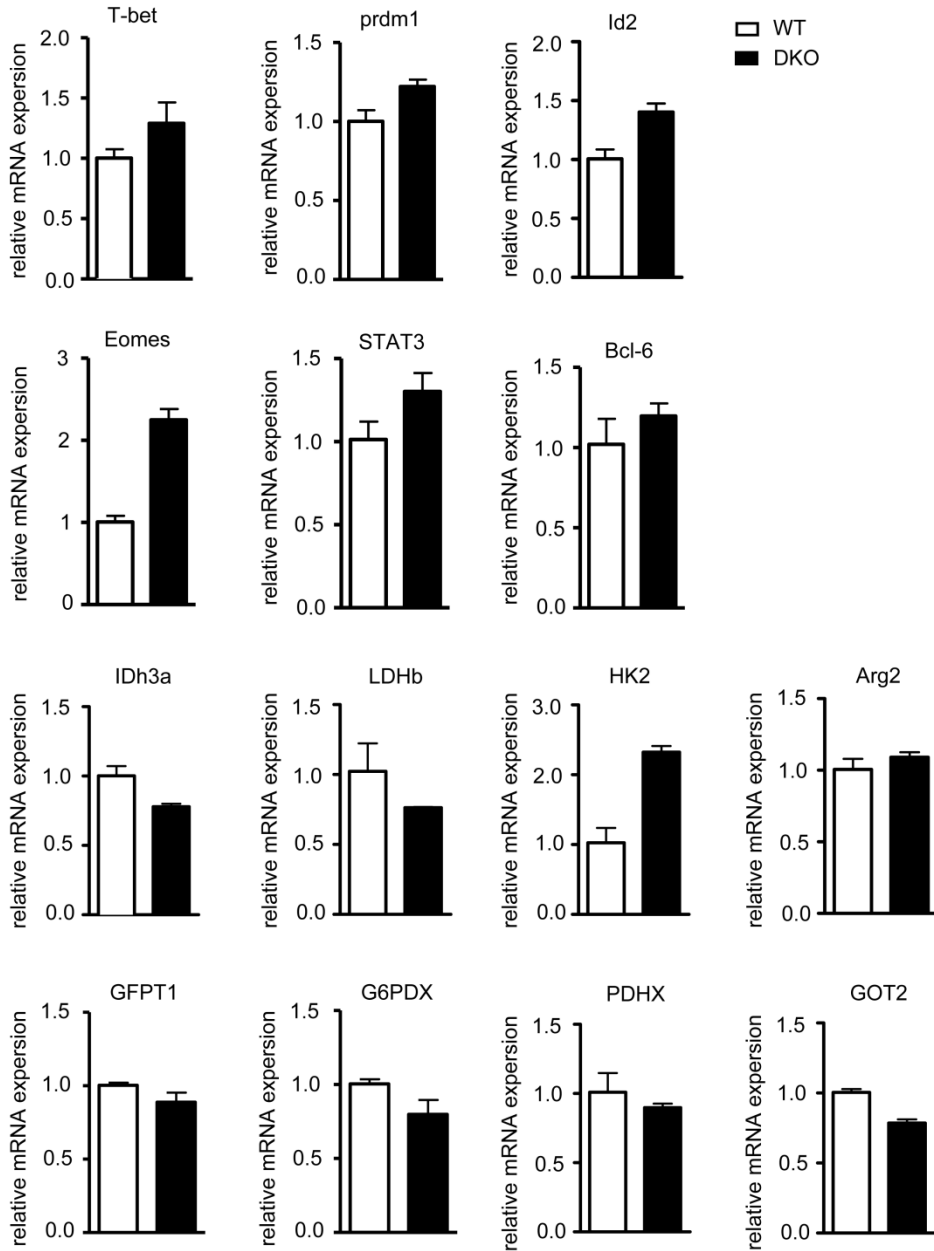

**Figure S4. Expression of indicated molecules in donor-derived effector OT1 T cells sorted from splenocytes of recipients on day 7 after *LM-OVA* infection.** mRNA levels of indicated molecules in sorted cells were detected by real-time qPCR. Data shown (mean  $\pm$  SEM) represent values from triplicate and represent three experiments. T cell-specific T-box transcription factor

(T-bet), Eomes, Blimp-1, inhibitor of DNA binding 2 (Id2), signal transducer and activator of transcription 3 (STAT3), B cell leukemia/lymphoma 6 (Bcl-6), isocitrate dehydrogenase 3 (NAD<sup>+</sup>) alpha (IDH3a), lactate dehydrogenase B (LDHb), arginase 2 (Arg2), glutamine-fructose-6-phosphate transaminase 1 (GFPT1), glucose-6-phosphate dehydrogenase X-linked (G6PDX), pyruvate dehydrogenase complex, component X (PDHX), hexokinase 2 (HK2), and glutamic-oxaloacetic transaminase 2 (GOT2).

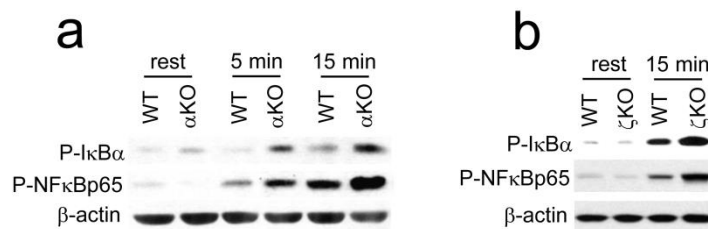

**Figure S5. Elevated TCR-induced I $\kappa$ B $\alpha$  and NF $\kappa$ B phosphorylation in DGK $\alpha$ <sup>-/-</sup> or DGK $\zeta$ <sup>-/-</sup> single knockout T cells.** WT, DGK $\alpha$ <sup>-/-</sup>, or DGK $\zeta$ <sup>-/-</sup> CD8 T cells were rested in PBS for 30 minutes and then left unstimulated or stimulated with anti-CD3 plus anti-CD28 for 5 or 10 minutes (a, DGK $\alpha$ <sup>-/-</sup> and WT) or 15 minutes (b, DGK $\zeta$ <sup>-/-</sup> and WT). Cell lysates were subjected to immunoblotting analysis with anti-phospho-I $\kappa$ B $\alpha$  and anti-phospho-p65 antibodies.

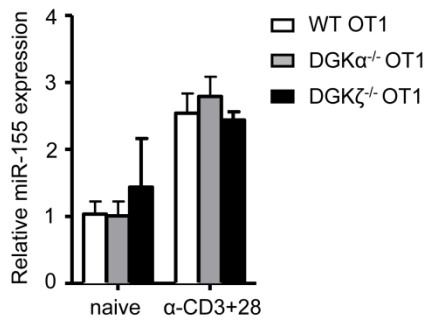

**Figure S6. miR-155 expression in DGK $\alpha$  or DGK $\zeta$  deficient OT1 T cells.** Naïve OT1 T cells sorted from WT-OT1, DGK $\alpha$ <sup>-/-</sup>-OT1, and DGK $\zeta$ <sup>-/-</sup>O-OT1 mice were either directly used to make RNA or after stimulation with plate-bound anti-CD3 and CD28 for 18 hours. miR-155 levels in these samples were measured by real-time qPCR.
